# Supplementary material for: Intestine Microbiota of Cattle Egret (<em>Bubulcus ibis</em>) and Pied Crow (<em>Corvus albus</em>) in Kinshasa City: A Risk Factor for Public Health?
Source: Preprints.org preprint supplement (doi:10.20944/preprints202008.0120.v1), 2020-08-05
Supplement: Supplementary file 3 [file supplementary]

## Sheet: Feuil1
Table 2. Host-gut microbiota interaction with dumps ( environmental conditions)
Hosts	Bubbulcus ibis (n=52)					Corvus albus (n=23)					Dispersion Index
Gut microbiota	A(n)	B(n)	C(n)	D(n)	E(n)	A(n)	B	C(n)	D(n)	E (n)	(I)
E. coli (Theodor Escherich, 1885)	19	14	12	4	3	5	7	3	3	5	16.8
Citrobacter spp (Werkman et Gillen, 1932)	19	14	12	4	3	5	7	3	3	5	16.8
Proteus vulgaris(Gustsave Hauser, 1885)	0	8	4	1	0	0	0	0	2	5	15.6
Klebsiella pneumonae (Friedländer)	0	0	0	2	0	0	0	0	0	0	8
Pseudomonas aeruginosa (Carle gessaed)	0	0	0	0	0	0	0	0	0	5	20
Salmonella spp	0	0	0	0	0	0	2	0	0	5	15.6
Legend: A (n), B (n), C(n), D(n), E(n) symbolize the number of infected birds by bacteria of the Dump A, B, C, D, E respectively.
